# Supplementary material for: Urinary Metabolomic Differentiation of Infants Fed on Human Breastmilk and Formulated Milk
Source: MDPI journal article supplement (doi:10.3390/metabo14020128), 2024-02-16
Supplement: s1 [file s1]

## **Supplementary data**

Title: Urinary Metabolomic Differentiation of Infants Fed on Human Breastmilk and Formulated Milk

Supplementary Table S1. Information about urine sample

| Neonate # | Type of milk feeding | Sex    | Gestational weeks | Day 1      |             | Day 7      |             | Day 14     |             | Mothers     |        |          |
|-----------|----------------------|--------|-------------------|------------|-------------|------------|-------------|------------|-------------|-------------|--------|----------|
|           |                      |        |                   | Weight (g) | Height (cm) | Weight (g) | Height (cm) | Weight (g) | Height (cm) | body weight | height | diseases |
| 1         | Formular milk        | Male   | 33                | 2210       | 48          | 2120       | 45          | 2270       | 47          | 58          | 163    | 0        |
| 2         | Formular milk        | Male   | 34                | 1900       | 42          | 1830       | 43          | 2040       | 44          | 71          | 151    | 0        |
| 3         | Formular milk        | Female | 34                | 2070       | 43          | 1980       | 44.5        | 2220       | 46.5        | 71          | 156    | 0        |
| 4         | Formular milk        | Male   | 33                | 2500       | 46          | 2410       | 48          | 2660       | 49          | 61          | 155    | 0        |
| 5         | Formular milk        | Female | 34                | 2220       | 44.5        | 2130       | 45          | 2400       | 46.5        | 71          | 156    | 0        |
| 6         | Formular milk        | Male   | 33                | 1950       | 44          | 1740       | 44          | 1900       | 44.5        | 60          | 159    | 0        |
| 7         | Formular milk        | Male   | 33                | 2110       | 43          | 2000       | 45          | 2130       | 45.5        | 81          | 165.6  | 0        |
| 8         | Formular milk        | Male   | 33                | 1480       | 40          | 1440       | 41          | 1580       | 42          | 81          | 165.6  | 0        |
| 9         | Formular milk        | Male   | 34                | 1900       | 44          | 1800       | 44          | 1970       | 45          | 62          | 160    | 0        |
| 10        | Formular milk        | Male   | 34                | 1780       | 43          | 1700       | 44          | 1830       | 44.5        | 62          | 160    | 0        |
| 11        | Formular milk        | Male   | 34                | 1880       | 42          | 1730       | 43.5        | 1900       | 46          | 68          | 160    | 0        |
| 12        | Formular milk        | Male   | 34                | 2240       | 45          | 2080       | 46          | 2210       | 47          | 80          | 160    | 0        |
| 13        | Formular milk        | Male   | 34                | 2430       | 50          | 2160       | 46          | 2260       | 47          | 71.7        | 164.2  | 0        |
| 14        | Formular             | Female | 34                | 3190       | 50          | 2840       | 49.5        | 3120       | 50.5        | 63.7        | 157    | 0        |

|    |               |        |    |      |      |      |      |      |      |      |       |   |
|----|---------------|--------|----|------|------|------|------|------|------|------|-------|---|
|    | milk          |        |    |      |      |      |      |      |      |      |       |   |
| 15 | Formular milk | Male   | 33 | 2390 | 44   | 2150 | 45   | 2248 | 46   | 96   | 156   | 0 |
| 16 | Human milk    | Female | 34 | 2260 | 44   | 2080 | 43.5 | 2260 | 44.5 | 57.4 | 165   | 0 |
| 17 | Human milk    | Female | 33 | 1810 | 42   | 1600 | 43   | 1710 | 42   | 65   | 160   | 0 |
| 18 | Human milk    | Female | 34 | 2590 | 47   | 2350 | 48.5 | 2440 | 50   | 97   | 168   | 0 |
| 19 | Human milk    | Female | 34 | 2590 | 44   | 2390 | 47   | 2570 | 48   | 83   | 163   | 0 |
| 20 | Human milk    | Female | 33 | 2370 | 45   | 2140 | 46   | 2320 | 47   | 94   | 167   | 0 |
| 21 | Human milk    | Male   | 33 | 1730 | 43   | 1540 | 41.5 | 1720 | 43   | 89.5 | 168   | 0 |
| 22 | Human milk    | Male   | 33 | 2050 | 42   | 1830 | 43   | 2060 | 44.5 | 89.5 | 168   | 0 |
| 23 | Human milk    | Male   | 34 | 1820 | 41.5 | 1720 | 41.5 | 1730 | 44   | 53   | 156   | 0 |
| 24 | Human milk    | Male   | 34 | 1900 | 42.5 | 1760 | 42   | 1830 | 44   | 53   | 156   | 0 |
| 25 | Human milk    | Female | 32 | 2040 | 41.5 | 1900 | 41   | 2030 | 45   | 86   | 160   | 0 |
| 26 | Human milk    | Female | 32 | 2080 | 43   | 1920 | 40.5 | 2080 | 44   | 86   | 160   | 0 |
| 27 | Human milk    | Female | 34 | 2120 | 46.5 | 2000 | 43   | 2200 | 47   | 64   | 156   | 0 |
| 28 | Human milk    | Female | 34 | 1970 | 43   | 1820 | 44   | 1890 | 46   | 65   | 156   | 0 |
| 29 | Human milk    | Male   | 34 | 2150 | 44   | 2120 | 44   | 2250 | 45   | 76.6 | 157.2 | 0 |
| 30 | Human milk    | Male   | 34 | 2300 | 46   | 2160 | 46   | 2250 | 47   | 76.6 | 157.2 | 0 |

---

milk

---

Supplementary Table S2. Retention time of peaks from untargeted metabolomics

| Peak # | Retention time (min) |
|--------|----------------------|
| 1      | 12.344               |
| 2      | 12.855               |
| 3      | 14.393               |
| 4      | 14.673               |
| 5      | 15.78                |
| 6      | 16.19                |
| 7      | 16.398               |
| 8      | 17.548               |
| 9      | 18.087               |
| 10     | 18.334               |
| 11     | 18.59                |
| 12     | 18.735               |
| 13     | 19.028               |
| 14     | 19.325               |
| 15     | 20.454               |
| 16     | 20.799               |
| 17     | 20.95                |
| 18     | 22.589               |
| 19     | 23.1                 |
| 20     | 23.381               |
| 21     | 23.753               |
| 22     | 24.297               |
| 23     | 24.61                |
| 24     | 24.715               |
| 25     | 24.94                |
| 26     | 25.425               |
| 27     | 25.657               |
| 28     | 26.031               |
| 29     | 26.14                |
| 30     | 26.266               |
| 31     | 26.589               |
| 32     | 27.04                |
| 33     | 28.22                |
| 34     | 29.226               |
| 35     | 29.331               |
| 36     | 29.425               |
| 37     | 29.694               |
| 38     | 29.935               |
| 39     | 30.155               |
| 40     | 30.361               |
| 41     | 30.473               |

|    |        |
|----|--------|
| 42 | 30.657 |
| 43 | 30.97  |
| 44 | 31.105 |
| 45 | 31.259 |
| 46 | 31.395 |
| 47 | 31.664 |
| 48 | 31.8   |
| 49 | 32.136 |
| 50 | 32.473 |
| 51 | 32.715 |
| 52 | 32.995 |
| 53 | 33.282 |
| 54 | 33.46  |
| 55 | 33.681 |
| 56 | 33.911 |
| 57 | 34.065 |
| 58 | 34.172 |
| 59 | 34.285 |
| 60 | 34.507 |
| 61 | 34.702 |
| 62 | 34.825 |
| 63 | 34.993 |
| 64 | 35.215 |
| 65 | 35.482 |
| 66 | 35.605 |
| 67 | 35.728 |
| 68 | 36.053 |
| 69 | 36.231 |
| 70 | 36.49  |
| 71 | 36.599 |
| 72 | 36.747 |
| 73 | 37     |
| 74 | 37.167 |
| 75 | 37.479 |
| 76 | 37.599 |
| 77 | 37.959 |
| 78 | 38.198 |
| 79 | 38.38  |
| 80 | 38.469 |
| 81 | 38.791 |
| 82 | 38.935 |
| 83 | 39.207 |
| 84 | 39.331 |
| 85 | 39.519 |

|     |        |
|-----|--------|
| 86  | 39.71  |
| 87  | 39.82  |
| 88  | 39.989 |
| 89  | 40.136 |
| 90  | 40.49  |
| 91  | 40.714 |
| 92  | 40.873 |
| 93  | 41.05  |
| 94  | 41.275 |
| 95  | 41.422 |
| 96  | 41.545 |
| 97  | 41.699 |
| 98  | 41.891 |
| 99  | 42.277 |
| 100 | 42.37  |
| 101 | 43.069 |
| 102 | 43.24  |
| 103 | 43.582 |
| 104 | 43.769 |
| 105 | 43.945 |
| 106 | 44.049 |
| 107 | 44.17  |
| 108 | 44.319 |
| 109 | 44.753 |
| 110 | 44.953 |
| 111 | 45.111 |
| 112 | 46.195 |
| 113 | 46.417 |
| 114 | 47.238 |
| 115 | 47.707 |
| 116 | 47.83  |
| 117 | 48.023 |
| 118 | 48.148 |
| 119 | 48.401 |
| 120 | 48.803 |
| 121 | 48.94  |
| 122 | 49.32  |
| 123 | 49.588 |
| 124 | 49.813 |
| 125 | 50.095 |
| 126 | 50.322 |
| 127 | 50.584 |
| 128 | 50.845 |
| 129 | 51.344 |

|     |        |
|-----|--------|
| 130 | 51.58  |
| 131 | 51.76  |
| 132 | 52.183 |
| 133 | 52.335 |
| 134 | 52.697 |
| 135 | 52.894 |
| 136 | 53.181 |
| 137 | 53.423 |
| 138 | 53.656 |
| 139 | 54.06  |
| 140 | 54.298 |
| 141 | 54.415 |
| 142 | 54.551 |
| 143 | 55.015 |
| 144 | 55.21  |
| 145 | 55.39  |
| 146 | 55.6   |
| 147 | 55.769 |
| 148 | 56.129 |
| 149 | 56.365 |
| 150 | 56.581 |
| 151 | 56.8   |
| 152 | 56.938 |
| 153 | 57.16  |
| 154 | 57.265 |
| 155 | 57.415 |
| 156 | 57.67  |
| 157 | 58.078 |
| 158 | 58.18  |
| 159 | 59.057 |
| 160 | 59.364 |
| 161 | 59.576 |
| 162 | 59.68  |
| 163 | 59.83  |



Supplementary Table S3. Metabolites from targeted metabolomics

| Compound                 | Class    |
|--------------------------|----------|
| 1-Hexadecanol            | alcohols |
| 2-Aminoethanol           | alcohols |
| Batyl alcohol            | alcohols |
| diethanolamine           | alcohols |
| docosanol                | alcohols |
| eicosanol                | alcohols |
| ethylene glycol          | alcohols |
| Histidinol               | alcohols |
| Metoprolol               | alcohols |
| octacosanol              | alcohols |
| Octadecanol              | alcohols |
| Octopamine               | alcohols |
| tetracosanol             | alcohols |
| tetradecanol             | alcohols |
| threoninol               | alcohols |
| Triacontanol             | alcohols |
| Triethanolamine          | alcohols |
| 1-Hexacosanol            | alcohols |
| Allantoin                | amides   |
| N-benzylpalmitamide      | Amides   |
| Carnosine                | amides   |
| Creatinine               | amides   |
| Glycyl-Glycine           | amides   |
| Oleamide                 | amides   |
| oxamic acid              | amides   |
| oxamide                  | amides   |
| Pantothenic acid         | amides   |
| Urea                     | amides   |
| 3,4-Dihydroxybenzylamine | amines   |
| Cadaverine               | amines   |
| Cystamine                | amines   |
| Fendiline                | amines   |
| Histamine                | amines   |
| homoglutamine            | amines   |
| Putrescine               | amines   |
| Spermidine               | amines   |
| Spermine                 | amines   |

|                             |             |
|-----------------------------|-------------|
| Vanillylamine               | amines      |
| 2-Aminoadipic acid          | amino acids |
| 2-Aminobutyric acid         | amino acids |
| 2-Aminoisobutyric acid      | amino acids |
| 2-Aminooctanoic acid        | amino acids |
| 2-Aminopimelic acid         | amino acids |
| 3-Aminoisobutyric acid      | amino acids |
| 3-Aminopropanoic acid       | amino acids |
| 3-Hydroxyanthranilic acid   | amino acids |
| 3-Hydroxy-kynurenine        | amino acids |
| 3-Methylcrotonylglycine     | amino acids |
| 3-Sulfinoalanine            | amino acids |
| 4-Aminobenzoic acid         | amino acids |
| 4-Aminobutyric acid         | amino acids |
| 4-Hydroxyproline            | amino acids |
| 5-Aminolevulinic acid       | amino acids |
| 5-Hydroxy-tryptophan        | amino acids |
| Acetylglycine               | amino acids |
| Alanine                     | amino acids |
| Anthranilic acid            | amino acids |
| Arginine                    | amino acids |
| Asparagine                  | amino acids |
| Aspartic acid               | amino acids |
| Citrulline                  | amino acids |
| Cystathionine               | amino acids |
| Cysteic acid                | amino acids |
| Cysteine                    | amino acids |
| Cystine                     | amino acids |
| Dimethylglycine             | amino acids |
| Dopa                        | amino acids |
| Glutamic acid               | amino acids |
| Glutamic acid 5-methylester | amino acids |
| Glutamine                   | amino acids |
| Glycine                     | amino acids |
| Histidine                   | amino acids |
| Homocysteine                | amino acids |
| Homocystine                 | amino acids |
| Homoserine                  | amino acids |
| Isobutyrylglycine           | amino acids |
| Isoleucine                  | amino acids |

|                              |               |
|------------------------------|---------------|
| Isovalerylglycine            | amino acids   |
| Kynurenine                   | amino acids   |
| Leucine                      | amino acids   |
| Lysine                       | amino acids   |
| Methionine                   | amino acids   |
| Methionine sulfone           | amino acids   |
| methyl cysteine              | amino acids   |
| methyl serine                | amino acids   |
| N6-Acetyllysine              | amino acids   |
| N-Acetylaspartic acid        | amino acids   |
| N-Acetylglutamine            | amino acids   |
| N-Acetyl-Lysine              | amino acids   |
| N-Acetyl-Ornithine           | amino acids   |
| N-Acetylserine               | amino acids   |
| N-Acetyltyrosine             | amino acids   |
| N-Butyrylglycine             | amino acids   |
| Norleucine                   | amino acids   |
| Norvaline                    | amino acids   |
| O-Acetylserine               | amino acids   |
| O-Phospho-Serine             | amino acids   |
| Ornithine                    | amino acids   |
| p-Aminohippuric acid         | amino acids   |
| Phenylalanine                | amino acids   |
| Proline                      | amino acids   |
| Saccharopine                 | amino acids   |
| Sarcosine                    | amino acids   |
| S-Benzyl-Cysteine            | amino acids   |
| Serine                       | amino acids   |
| Suberylglycine               | amino acids   |
| Threo-β-hydroxyaspartic acid | amino acids   |
| Threonine                    | amino acids   |
| Tiglylglycine                | amino acids   |
| Tryptophan                   | amino acids   |
| Tyrosine                     | amino acids   |
| Ureidopropionic acid         | amino acids   |
| Valine                       | amino acids   |
| pyrrolnitrin                 | azoles        |
| 1,5-Anhydroglucitol          | carbohydrates |
| 1,6-Anhydroglucose           | carbohydrates |
| 2,3-Bisphosphoglyceric acid  | carbohydrates |

|                              |               |
|------------------------------|---------------|
| 2-Deoxy-D-glucose            | carbohydrates |
| 6-Phosphogluconic acid       | carbohydrates |
| Allose                       | carbohydrates |
| Arabinose                    | carbohydrates |
| Arabitol                     | carbohydrates |
| Ascorbic acid                | carbohydrates |
| cellobiose                   | carbohydrates |
| Dihydroxyacetone             | carbohydrates |
| Dihydroxyacetone phosphate   | carbohydrates |
| D-Erythrose                  | carbohydrates |
| Erythrose 4-phosphate        | carbohydrates |
| Erythrulose                  | carbohydrates |
| Fructose                     | carbohydrates |
| Fructose 1-phosphate         | carbohydrates |
| Fructose 6-phosphate         | carbohydrates |
| Fucose                       | carbohydrates |
| Galactitol                   | carbohydrates |
| D-Galactosamine              | carbohydrates |
| Galactose                    | carbohydrates |
| Galacturonic acid            | carbohydrates |
| Glucaric acid                | carbohydrates |
| Gluconic acid                | carbohydrates |
| D-Glucono-1,4-lactone        | carbohydrates |
| D-Glucono-1,5-lactone        | carbohydrates |
| Glucosamine                  | carbohydrates |
| Glucose                      | carbohydrates |
| Glucose 6-phosphate          | carbohydrates |
| Glucuronic acid              | carbohydrates |
| Glyceraldehyde               | carbohydrates |
| D-Glyceraldehyde 3-phosphate | carbohydrates |
| Glyceric acid                | carbohydrates |
| Glycerol                     | carbohydrates |
| Glycerol 2-phosphate         | carbohydrates |
| Glycerol 3-phosphate         | carbohydrates |
| Inositol                     | carbohydrates |
| Inositol phosphate           | carbohydrates |
| Isomaltose                   | carbohydrates |
| Lactitol                     | carbohydrates |
| Lactose                      | carbohydrates |
| lactulose                    | carbohydrates |

|                           |               |
|---------------------------|---------------|
| Lyxose                    | carbohydrates |
| Maltitol                  | carbohydrates |
| Maltose                   | carbohydrates |
| maltotriose               | carbohydrates |
| Mannitol                  | carbohydrates |
| Mannose                   | carbohydrates |
| Mannose 6-phosphate       | carbohydrates |
| melibiose                 | carbohydrates |
| meso-Erythritol           | carbohydrates |
| N-Acetylmannosamine       | carbohydrates |
| N-Acetylneuraminic acid   | carbohydrates |
| palatinose                | carbohydrates |
| Psicose                   | carbohydrates |
| raffinose                 | carbohydrates |
| Rhamnose                  | carbohydrates |
| Ribitol                   | carbohydrates |
| Ribonolactone             | carbohydrates |
| Ribose 5-phosphate        | carbohydrates |
| Ribose                    | carbohydrates |
| Ribulose 5-phosphate      | carbohydrates |
| Ribulose                  | carbohydrates |
| saccharo-1,4-lactone      | carbohydrates |
| Sedoheptulose 7-phosphate | carbohydrates |
| Sorbitol                  | carbohydrates |
| Sorbose                   | carbohydrates |
| Sucrose                   | carbohydrates |
| Tagatose                  | carbohydrates |
| Threitol                  | carbohydrates |
| Threonic acid             | carbohydrates |
| Trehalose                 | carbohydrates |
| Trehalose 6-phosphate     | carbohydrates |
| Turanose                  | carbohydrates |
| Xylitol                   | carbohydrates |
| Xylose                    | carbohydrates |
| Xylulose                  | carbohydrates |
| gluconic acid lactone     | esters        |
| Mevalonic lactone         | esters        |
| O-Phosphoethanolamine     | esters        |
| eicosaenoic acid          | fatty acids   |
| 11-eicosenoic acid        | fatty acids   |

|                           |             |
|---------------------------|-------------|
| 5-Aminovaleric acid       | fatty acids |
| Dihomo-gamma-linolenate   | fatty acids |
| Acetoacetic acid          | fatty acids |
| alpha-linolenic acid      | fatty acids |
| arachidic acid            | fatty acids |
| Arachidonic acid          | fatty acids |
| behenic acid              | fatty acids |
| Caproic acid              | fatty acids |
| cis-10-heptadecenoic acid | fatty acids |
| cis-10-pentadecenoic acid | fatty acids |
| Decanoic acid             | fatty acids |
| dihydrocapsiate           | fatty acids |
| Docosahexaenoic acid      | fatty acids |
| Docosapentaenoic acid     | fatty acids |
| Eicosapentaenoic acid     | fatty acids |
| Elaidic acid              | fatty acids |
| heneicosanoic acid        | fatty acids |
| heptadecanoic acid        | fatty acids |
| Juniperic acid            | fatty acids |
| lauric acid               | fatty acids |
| Linoleic acid             | fatty acids |
| Lipoic acid               | fatty acids |
| Margaric acid             | fatty acids |
| Methyl arachidonate       | fatty acids |
| Myristic acid             | fatty acids |
| myristoleic acid          | fatty acids |
| nonadecanoic acid         | fatty acids |
| Nonanoic acid             | fatty acids |
| norhydrocapsiate          | fatty acids |
| Octanoic acid             | fatty acids |
| Oleic acid                | fatty acids |
| Palmitic acid             | fatty acids |
| Palmitoleic acid          | fatty acids |
| pentadecanoic acid        | fatty acids |
| Stearic acid              | fatty acids |
| tetracosanoic acid        | fatty acids |
| tricosanoic acid          | fatty acids |
| tridecanoic acid          | fatty acids |
| Valproic acid             | fatty acids |
| Monostearin               | glycerides  |

|                                      |                     |
|--------------------------------------|---------------------|
| 5-Methoxytryptamine                  | Indoles             |
| indole-3-acetic acid                 | Indoles             |
| Melatonin                            | Indoles             |
| Tryptamine                           | Indoles             |
| Hydroxylamine                        | inorganic compounds |
| 2'-Deoxyuridine                      | nucleosides         |
| 5'-Methylthioadenosine               | nucleosides         |
| Cytidine                             | nucleosides         |
| Thymidine                            | nucleosides         |
| Thymidine monophosphate              | nucleosides         |
| Uridine                              | nucleosides         |
| Uridine monophosphate                | nucleosides         |
| Xanthosine                           | nucleosides         |
| Xanthosine monophosphate             | nucleosides         |
| Adenosine 3',5'-cyclic monophosphate | nucleotides         |
| Adenosine monophosphate              | nucleotides         |
| 2-Hydroxybutyric acid                | organic acids       |
| 2-Hydroxyglutaric acid               | organic acids       |
| 2-Hydroxyhippuric acid               | organic acids       |
| 2-Hydroxyisobutyric acid             | organic acids       |
| 2-Hydroxyisocaproic acid             | organic acids       |
| 2-Hydroxyisovaleric acid             | organic acids       |
| 2-Isopropylmalic acid                | organic acids       |
| 2-Ketoadipic acid                    | organic acids       |
| 2-Ketobutyric acid                   | organic acids       |
| 2-Ketoglutaric acid                  | organic acids       |
| 2-Ketoisocaproic acid                | organic acids       |
| 3-Methyl-2-oxobutanoic acid          | organic acids       |
| 2-Methyl-3-hydroxybutyric acid       | organic acids       |
| 2-Methylhippuric acid                | organic acids       |
| 2-Phosphoglyceric acid               | organic acids       |
| 3-Hydroxyvalproic acid               | organic acids       |
| 5-Hydroxyvalproic acid               | organic acids       |
| 2-Propylglutaric acid                | organic acids       |
| 3-Aminopentanedioate                 | organic acids       |
| 5-Amino-5-deoxy-3-dehydroshikimate   | organic acids       |
| 3-Hydroxy-3-methylglutaric acid      | organic acids       |
| 3-Hydroxybutyric acid                | organic acids       |
| 3-Hydroxyglutaric acid               | organic acids       |
| 3-Hydroxyisobutyric acid             | organic acids       |

|                                 |               |
|---------------------------------|---------------|
| 3-Hydroxyisovaleric acid        | organic acids |
| 3-Hydroxyphenylacetic acid      | organic acids |
| 3-Hydroxypropionic acid         | organic acids |
| 3-Hydroxypyruvic acid           | organic acids |
| 3-Methoxy-4-hydroxybenzoic acid | organic acids |
| 3-Methyl-2-oxovaleric acid      | organic acids |
| 3-Methyladipic acid             | organic acids |
| 3-Methylglutaric acid           | organic acids |
| 3-Phenyllactic acid             | organic acids |
| 3-Phosphoglyceric acid          | organic acids |
| 4-Hydroxybenzoic acid           | organic acids |
| 4-Hydroxyphenylacetic acid      | organic acids |
| 4-Hydroxyphenyllactic acid      | organic acids |
| 4-Hydroxyphenylpyruvic acid     | organic acids |
| 5-Dehydroquinic acid            | organic acids |
| 5-Hydroxymethyl-2-furoic acid   | organic acids |
| 5-Oxoproline                    | organic acids |
| Aconitic acid                   | organic acids |
| Adipic acid                     | organic acids |
| Azelaic acid                    | organic acids |
| Benzoic acid                    | organic acids |
| Biotin                          | organic acids |
| cinnamic acid                   | organic acids |
| Citramalic acid                 | organic acids |
| Citric acid                     | organic acids |
| coumaric acid                   | organic acids |
| L-Dihydroorotate                | organic acids |
| Dodecanedioic acid              | organic acids |
| Ethylmalonic acid               | organic acids |
| ferulic acid                    | organic acids |
| Fumaric acid                    | organic acids |
| Glutaconic acid                 | organic acids |
| Glutaric acid                   | organic acids |
| Glycolic acid                   | organic acids |
| Glyoxylic acid                  | organic acids |
| Hexanoylglycine                 | organic acids |
| Hippuric acid                   | organic acids |
| Homogentisic acid               | organic acids |
| Homovanillic acid               | organic acids |
| Hypotaurine                     | organic acids |



|                         |               |
|-------------------------|---------------|
| Isocitric acid          | organic acids |
| Kynurenic acid          | organic acids |
| Lactic acid             | organic acids |
| Maleic acid             | organic acids |
| Malic acid              | organic acids |
| Malonic acid            | organic acids |
| Mesaconic acid          | organic acids |
| Methylmalonic acid      | organic acids |
| Methylsuccinic acid     | organic acids |
| Nicotinic acid          | organic acids |
| Orotic acid             | organic acids |
| Oxalacetic acid         | organic acids |
| Oxalic acid             | organic acids |
| Phenylacetic acid       | organic acids |
| Phenylpyruvic acid      | organic acids |
| Phosphoenolpyruvic acid | organic acids |
| Pimelic acid            | organic acids |
| pipecolic acid          | organic acids |
| Porphobilinogen         | organic acids |
| Protocatechuic acid     | organic acids |
| pyroglutamic acid       | organic acids |
| Pyruvic acid            | organic acids |
| quinic acid             | organic acids |
| Ribonic acid            | organic acids |
| Salicylic acid          | organic acids |
| Sebacic acid            | organic acids |
| Shikimic acid           | organic acids |
| sinapic acid            | organic acids |
| Suberic acid            | organic acids |
| Succinic acid           | organic acids |
| Succinylacetone         | organic acids |
| Tartaric acid           | organic acids |
| Taurine                 | organic acids |
| Thiodiglycolic acid     | organic acids |
| Tropic acid             | organic acids |
| Ureidosuccinic acid     | organic acids |
| Urocanic acid           | organic acids |
| Vanilmandelic acid      | organic acids |
| Catechol                | phenols       |
| Coniferyl alcohol       | phenols       |

|                       |                  |
|-----------------------|------------------|
| Coniferyl aldehyde    | phenols          |
| Dopamine              | phenols          |
| Epinephrine           | phenols          |
| Hydroquinone          | phenols          |
| Norepinephrine        | phenols          |
| Pyrogallol            | phenols          |
| Tyramine              | phenols          |
| Phosphoric acid       | phosphoric acids |
| 7-Methylguanine       | purines          |
| Adenine               | purines          |
| Adenosine             | purines          |
| Guanine               | purines          |
| Guanosine             | purines          |
| Hypoxanthine          | purines          |
| Inosine               | purines          |
| Inosine monophosphate | purines          |
| ParaXanthine          | purines          |
| Uric acid             | purines          |
| Xanthine              | purines          |
| 3-hydroxypyridine     | pyridines        |
| 4-hydroxypyridine     | pyridines        |
| Niacinamide           | pyridines        |
| Pyridoxal             | pyridines        |
| Pyridoxamine          | pyridines        |
| Pyridoxine            | pyridines        |
| Quinolinic acid       | pyridines        |
| Cytosine              | pyrimidines      |
| Dihydrouracil         | pyrimidines      |
| Thymine               | pyrimidines      |
| Uracil                | pyrimidines      |
| campesterol           | steroids         |
| Cholecalciferol       | steroids         |
| Cholestanol           | steroids         |
| Cholesterol           | steroids         |
| Sitosterol            | steroids         |
| Stigmasterol          | steroids         |
| lanosterol            | terpenoids       |
| Methoprene acid       | terpenoids       |
| alpha-tocopherol      | tocopherols      |
| delta-tocopherol      | tocopherols      |
